# Supplementary material for: Identification and Analysis of the CBF Gene Family in Three Species of Acer under Cold Stress
Source: MDPI journal article supplement (doi:10.3390/ijms24032088), 2023-01-20
Supplement: s1 [file s1]

## *Supplementary Material*

**Supplementary Table 1 :** The sequences of primers used for qRT-PCR

| Gene name         | Forward sequence (5'to 3') | Reverse sequence (5'to 3') |
|-------------------|----------------------------|----------------------------|
| Apse002T0243400.1 | GTTACTCTGACCCACAACCG       | AGCCAACATCAATTCTCGTC       |
| Apse002T0243400.1 | GTTACTCTGACCCACAACCG       | AGCCAACATCAATTCTCGTC       |
| Apse002T0243300.1 | AATGTGGAGGTGGCTTCTG        | ATCCCAAATACCGCCTCTTC       |
| Apse002T0243300.1 | AATGTGGAGGTGGCTTCTG        | ATCCCAAATACCGCCTCTTC       |
| Apse011T0099600.1 | GACAACTATCGGACCCTCTTTC     | CTGAATGAGAAGCTCTACTGGC     |
| Apse011T0099600.1 | GACAACTATCGGACCCTCTTTC     | CTGAATGAGAAGCTCTACTGGC     |
| Apse002T0243600.1 | CAGTCATTGCCAAGTCCAAAC      | ATGAAAAGTCGGGTGCCTC        |
| Apse002T0243600.1 | CAGTCATTGCCAAGTCCAAAC      | ATGAAAAGTCGGGTGCCTC        |
| Apse007T0094500.1 | TCAACCAAAAGTACCTCCACC      | CAGAAACCCATTGCCACTAC       |
| Apse007T0094500.1 | TCAACCAAAAGTACCTCCACC      | CAGAAACCCATTGCCACTAC       |
| Acyan11G0087800.1 | GCAGTGGGACAGTTGAATTG       | CTGACATGAACGACAGAGGG       |
| Acyan11G0087800.1 | GCAGTGGGACAGTTGAATTG       | CTGACATGAACGACAGAGGG       |
| Acyan11G0087900.1 | GTGTTTGACATGCCTGGATTG      | TTCTCTACTGCTTCCACTTGC      |
| Acyan11G0087900.1 | GTGTTTGACATGCCTGGATTG      | TTCTCTACTGCTTCCACTTGC      |
| Acyan02G0289000.1 | CCCATTGCCAAGTCCAAAC        | TCCATGATAAATCGGGTGCC       |
| Acyan02G0289000.1 | CCCATTGCCAAGTCCAAAC        | TCCATGATAAATCGGGTGCC       |
| Acyan07G0093600.1 | TCAACCAAAAGTACCTCCACC      | GCCTAACACCCCGATAAGATG      |

## Supplementary Material

|                   |                        |                        |
|-------------------|------------------------|------------------------|
| Acyan07G0093600.1 | TCAACCAAAAGTACCTCCACC  | GCCTAACACCCCGATAAGATG  |
| Atru.chr10.1810   | CTAACTTTCCTTTGCCTTGCG  | ATTTAGATCCAACGGCGAGG   |
| Atru.chr10.1810   | CTAACTTTCCTTTGCCTTGCG  | ATTTAGATCCAACGGCGAGG   |
| Atru.chr1.1042    | TGCTAGGAAATTGTACGGACC  | AAACCACGAGAAGGGAACATAG |
| Atru.chr1.1042    | TGCTAGGAAATTGTACGGACC  | AAACCACGAGAAGGGAACATAG |
| Atru.chr2.1230    | CACTACAAC TACAACCCACC  | CTCCCTGTTTTCTCTGTTTTC  |
| Atru.chr2.1230    | CACTACAAC TACAACCCACC  | CTCCCTGTTTTCTCTGTTTTC  |
| Atru.chr4.1701    | GCAGTGAAGCTGTATAGAGGTG | GTGTCGAAAGTCCCTAACCAG  |
| Atru.chr4.1701    | GCAGTGAAGCTGTATAGAGGTG | GTGTCGAAAGTCCCTAACCAG  |
| Atru.chr13.731    | AAGTTGGTGCTAGGGTTGAC   | AGGTAACCGGACAGAATTGG   |
| Atru.chr13.731    | AAGTTGGTGCTAGGGTTGAC   | AGGTAACCGGACAGAATTGG   |
| Atru.chr6.2697    | CACCAATTTACGCAACCTG    | CCTTTGTCTCACACCTCTGTAG |
| Atru.chr6.2697    | CACCAATTTACGCAACCTG    | CCTTTGTCTCACACCTCTGTAG |
| Atru.chr4.2790    | CAGGGAGGTTTCTTGGAGTTC  | CTCTTTCGTTGTAGGGTCTCTG |
| 18S               | GAGGTAGCTTCGGGCGCAACT  | GCAGGTTAGCGAAATGCGATAC |

---
